# Supplementary material for: Evaluation of the reproducibility of amplicon sequencing with Illumina MiSeq platform
Source: PubMed Central journal article supplement (PMC5409056; doi:10.1371/journal.pone.0176716), 2017-04-28
Supplement: pone.0176716.s001.pdf [file pone.0176716.s001.pdf]

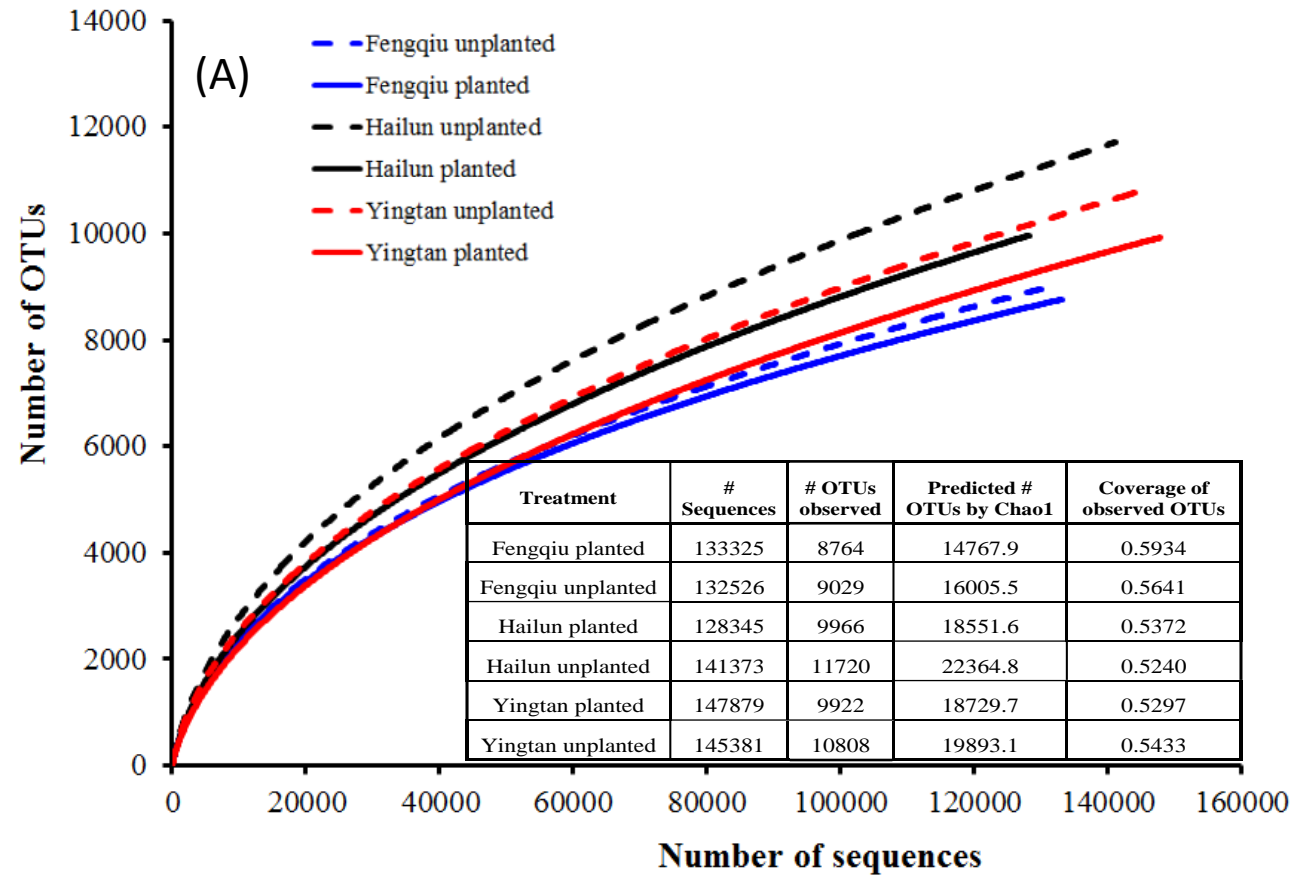

S1A Fig. Rarefaction analysis based on treatments for experiment I.

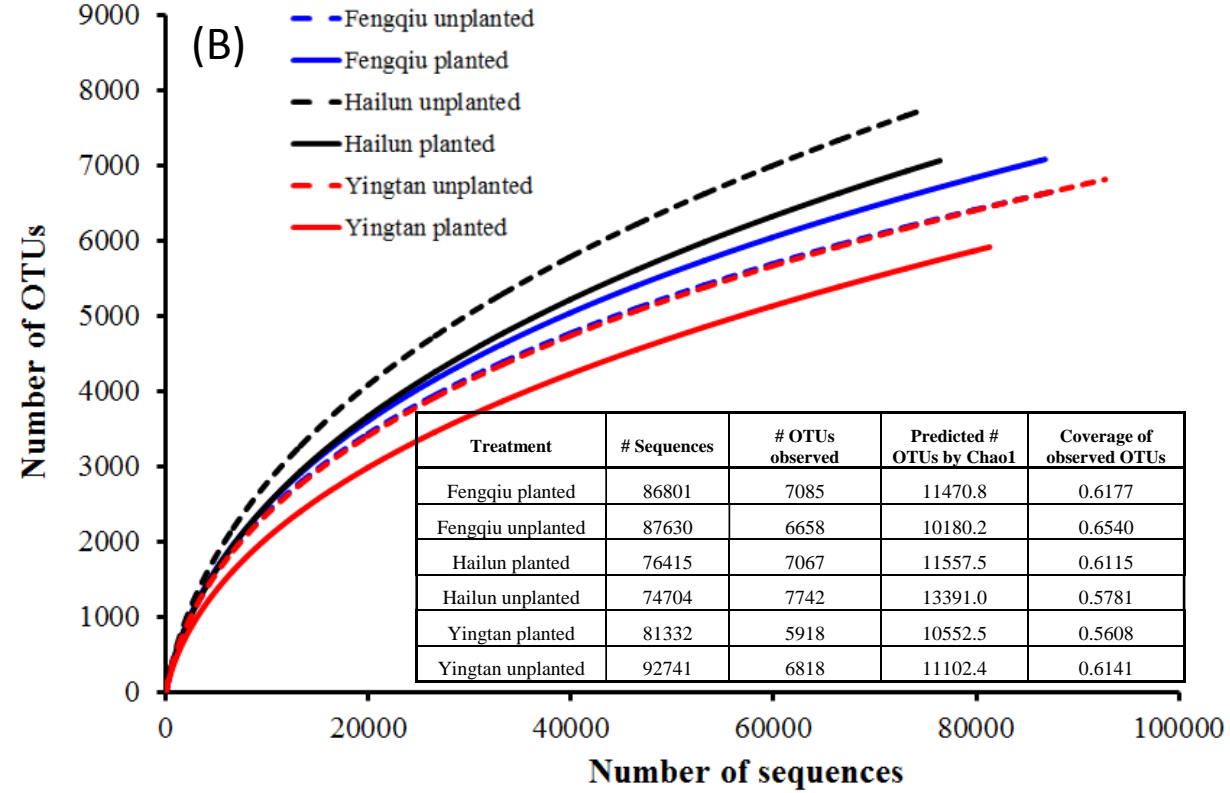

S 1B Fig. Rarefaction analysis based on treatments for experiment II.
