# Supplementary material for: Evaluation of the reproducibility of amplicon sequencing with Illumina MiSeq platform
Source: PubMed Central journal article supplement (PMC5409056; doi:10.1371/journal.pone.0176716), 2017-04-28
Supplement: pone.0176716.s002.pdf [file pone.0176716.s002.pdf]

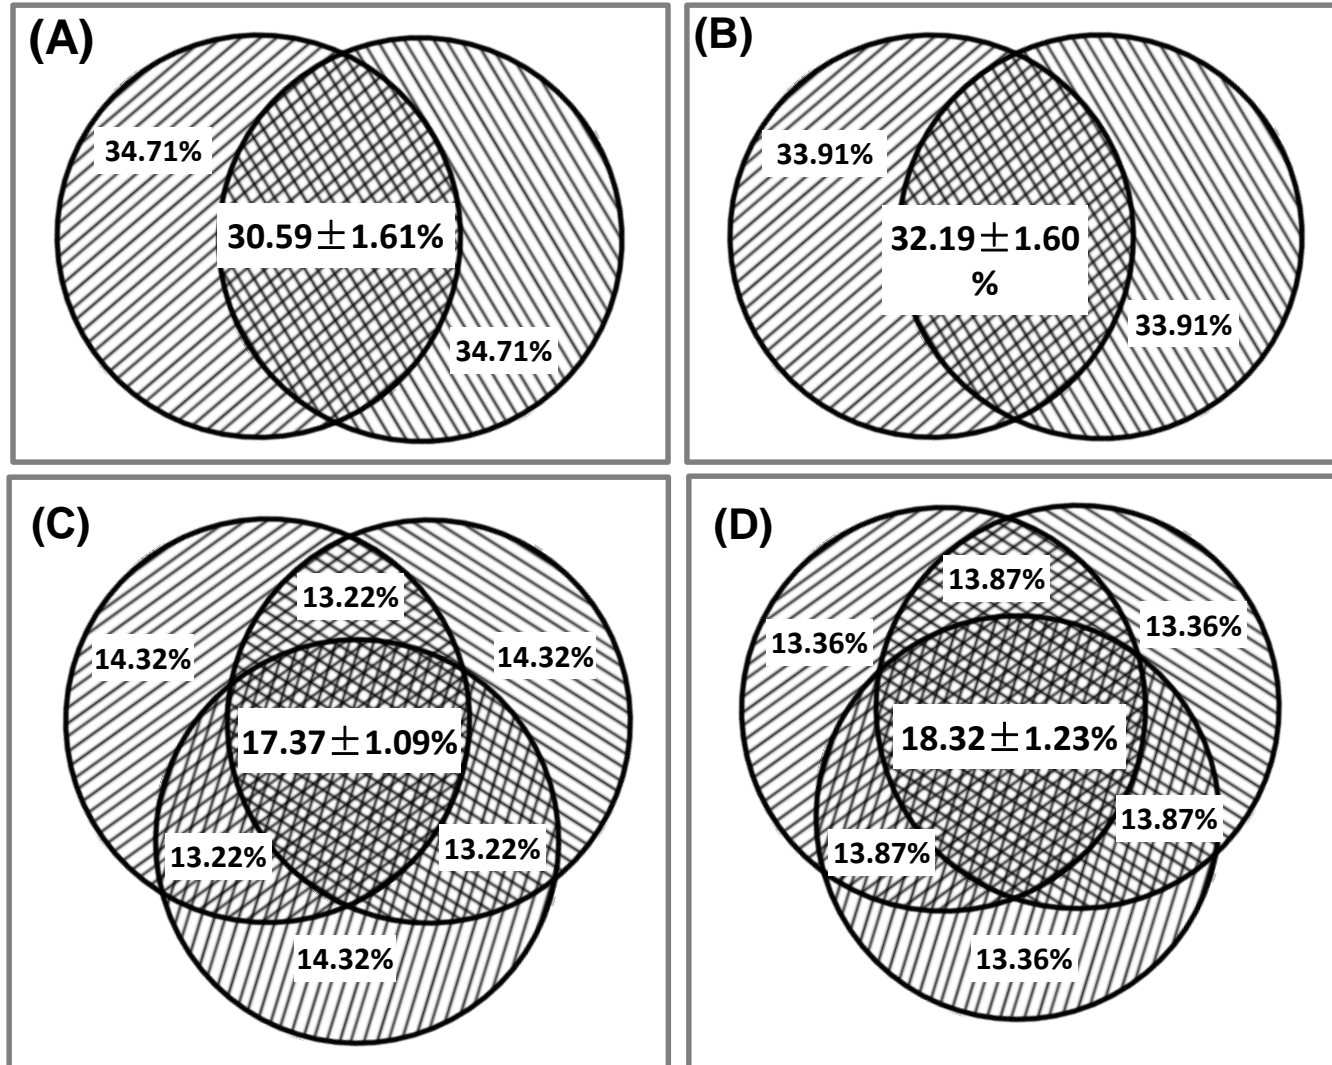

**S2 Fig. OTU overlaps between/among technical replicates for experiment II.** (A) Between two technical replicates, singletons not removed; (B) between two technical replicates, singletons removed; (C) among three technical replicates, singletons not removed; (D) among three technical replicates, singletons removed.
