# Supplementary material for: Evaluation of the reproducibility of amplicon sequencing with Illumina MiSeq platform
Source: PubMed Central journal article supplement (PMC5409056; doi:10.1371/journal.pone.0176716), 2017-04-28
Supplement: pone.0176716.s003.pdf [file pone.0176716.s003.pdf]

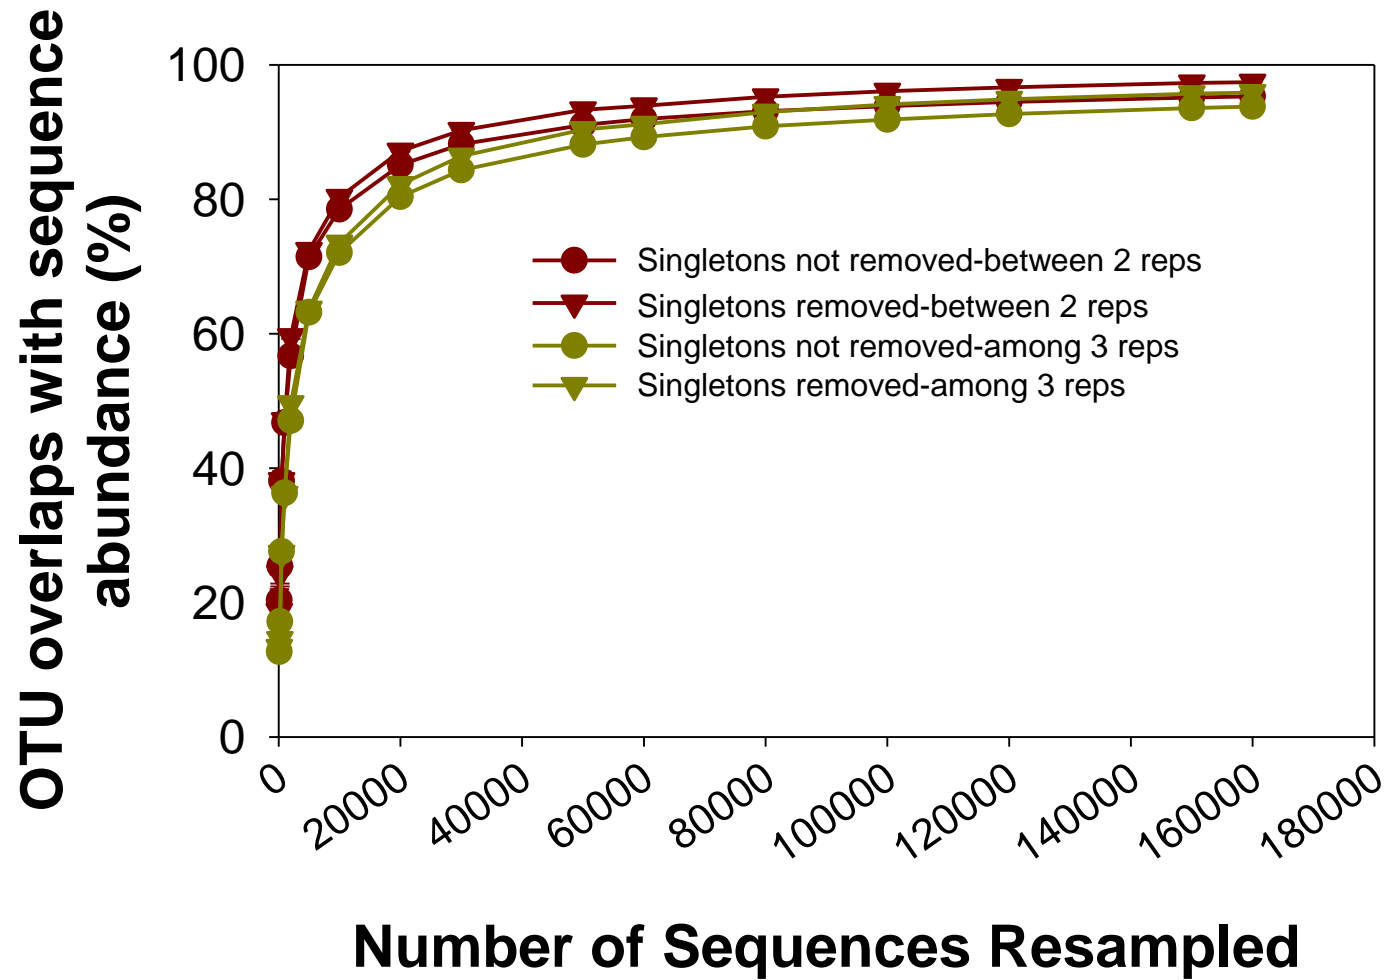

**S3 Fig. Sequence abundance weighted OTU Overlaps generated with using Uclust between/among technical replicates at different sequencing depth. At a sequencing depth of about 30,000 reads, overlaps of both two and three replicates were reaching a plateau no matter singletons were removed or not.**
