# Supplementary material for: Evaluation of the reproducibility of amplicon sequencing with Illumina MiSeq platform
Source: PubMed Central journal article supplement (PMC5409056; doi:10.1371/journal.pone.0176716), 2017-04-28
Supplement: pone.0176716.s004.pdf [file pone.0176716.s004.pdf]

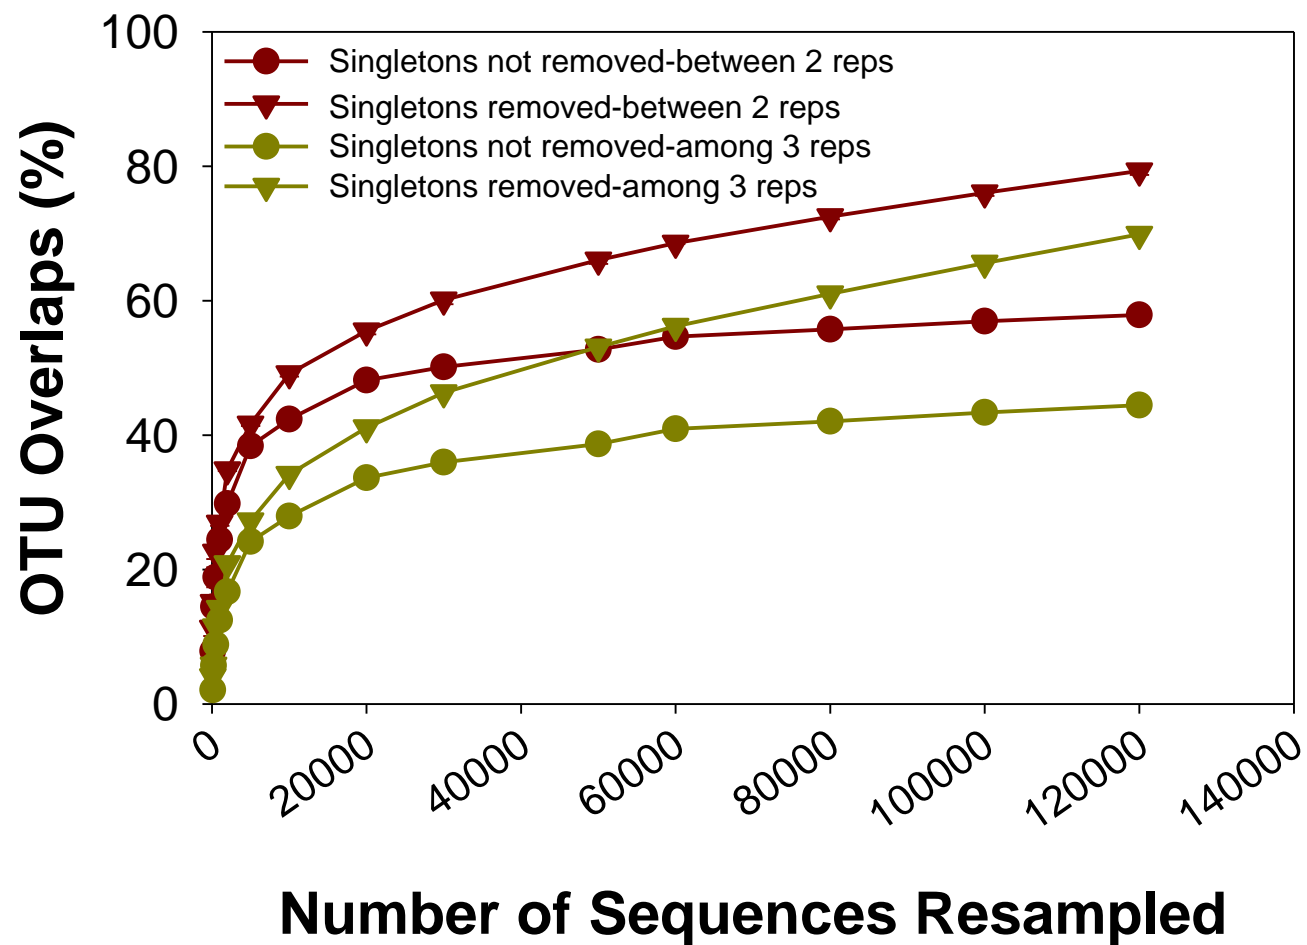

**S4 Figure. Overlaps of OTUs generated using UPARSE between/among technical replicates at different sequencing depth.** At a sequencing depth of about 30,000 reads, overlaps of both two and three replicates were reaching a plateau when singletons were not removed.
