# Supplementary material for: Evaluation of the reproducibility of amplicon sequencing with Illumina MiSeq platform
Source: PubMed Central journal article supplement (PMC5409056; doi:10.1371/journal.pone.0176716), 2017-04-28
Supplement: pone.0176716.s005.pdf [file pone.0176716.s005.pdf]

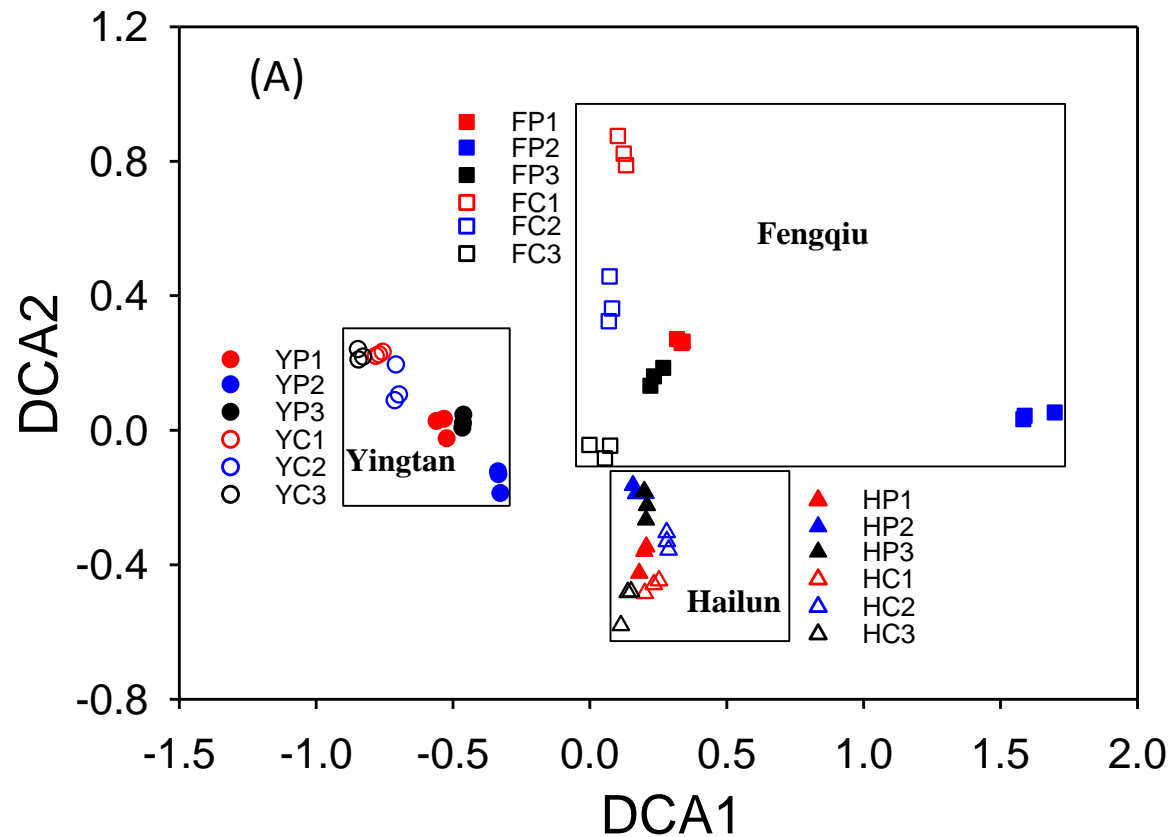

**S5A Fig. Detrended corresponding analysis of the microbial communities for experiment I, with singletons removed.** Samples were from three experiment locations (H, Hailun; F, Fengqiu; Y, Yingtian) with two treatments at each location: planted (P) and unplanted (C, control), each treatment with three field replicates. Each soil was tagged three times as technical replicates. The three technical replicates of each soil were sequenced in the same MiSeq run. Singletons were removed.

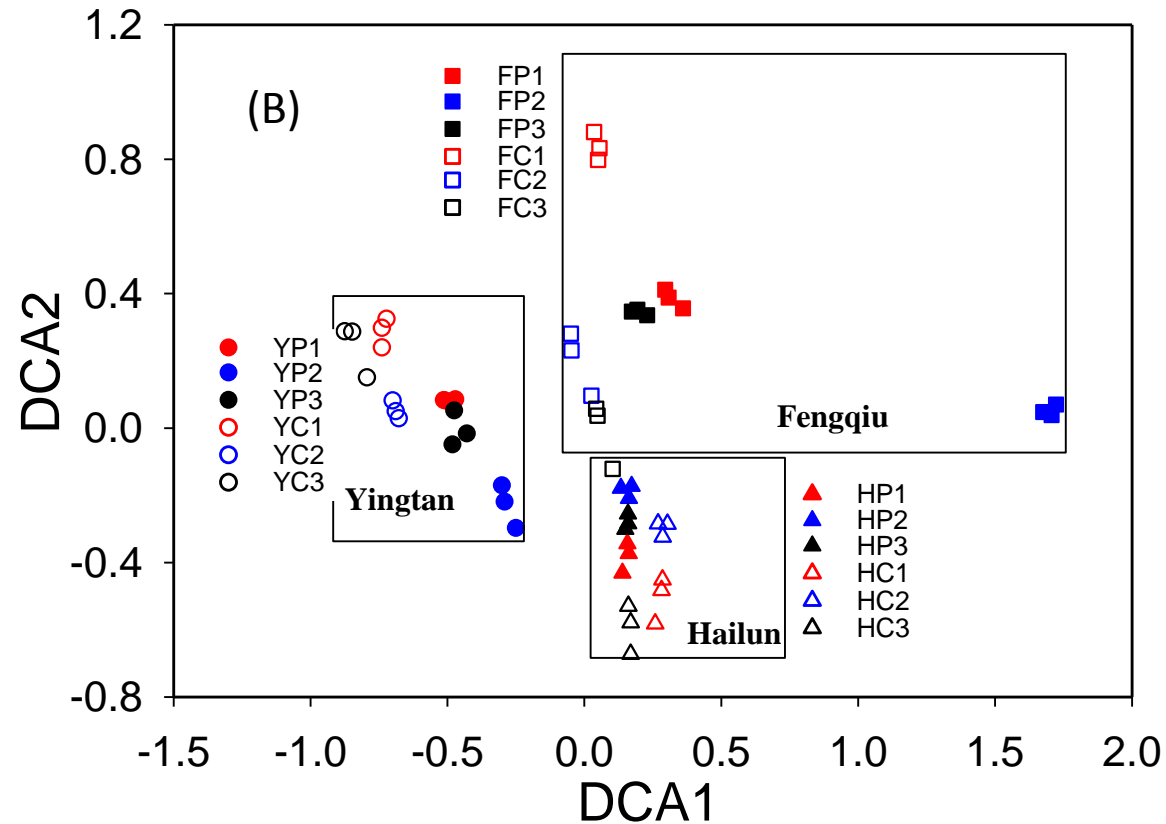

**S5B Fig. Detrended corresponding analysis of the microbial communities for experiment II, with singletons not removed.** Samples were from three experiment locations (H, Hailun; F, Fengqiu; Y, Yingtian) with two treatments at each location: planted (P) and unplanted (C, control), each treatment with three field replicates. Each soil was tagged three times as technical replicates. The three technical replicates of each soil were sequenced in three different MiSeq runs. Singletons were not removed.

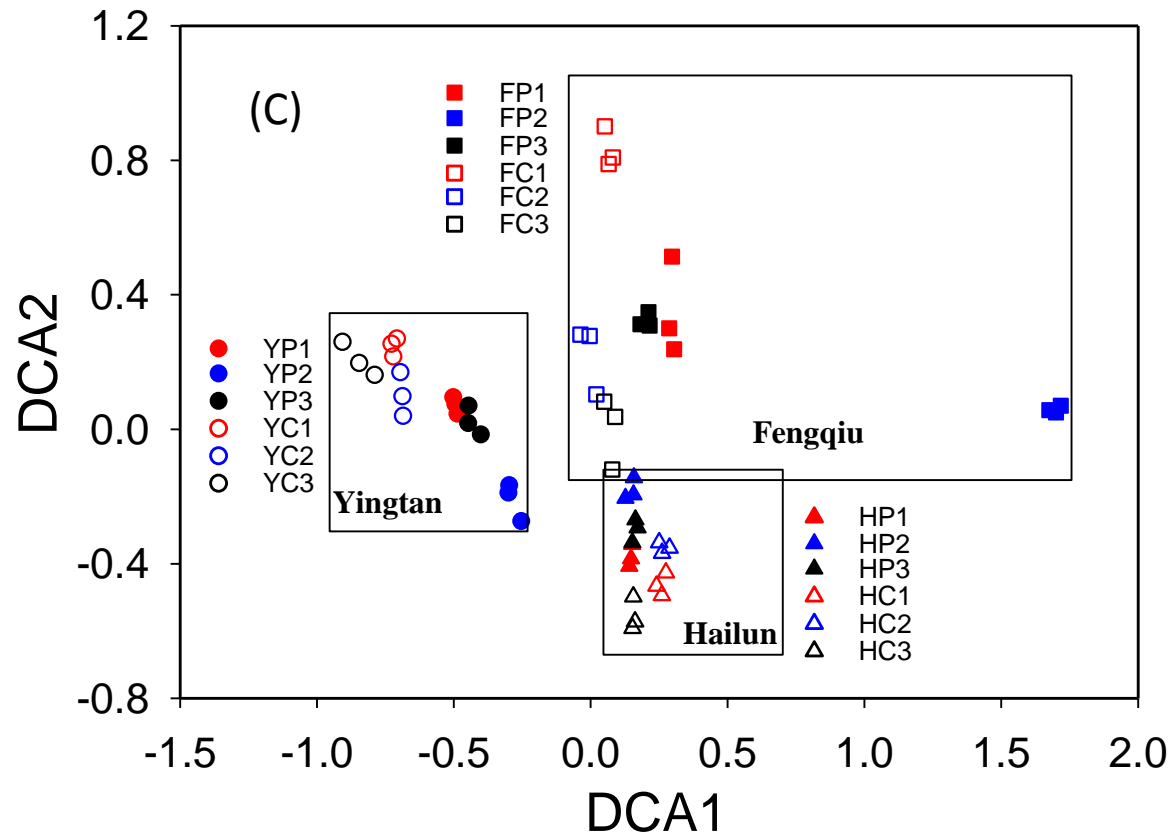

**S5C Fig. Detrended corresponding analysis of the microbial communities for experiment II, with singletons removed.** Samples were from three experiment locations (H, Hailun; F, Fengqiu; Y, Yingtian) with two treatments at each location: planted (P) and unplanted (C, control), each treatment with three field replicates. Each soil was tagged three times as technical replicates. The three technical replicates of each soil were sequenced in three different MiSeq runs. Singletons were removed.
