# Supplementary material for: Evaluation of the reproducibility of amplicon sequencing with Illumina MiSeq platform
Source: PubMed Central journal article supplement (PMC5409056; doi:10.1371/journal.pone.0176716), 2017-04-28
Supplement: pone.0176716.s008.pdf [file pone.0176716.s008.pdf]

**S3 Table.** Summary of sequencing statistics for experiment I

| Tagged PCR Library | Total raw sequences | Effective sequences for analysis | # of OTUs (97% cutoff) | # of OTUs after removing singletons | Predicted # OTUs by Chao1 |                           |
|--------------------|---------------------|----------------------------------|------------------------|-------------------------------------|---------------------------|---------------------------|
|                    |                     |                                  |                        |                                     | Number                    | Coverage of observed OTUs |
| <b>FP11</b>        | 13385               | 12500                            | 2976                   | 2811                                | 5745.5                    | 0.518                     |
| <b>FP12</b>        | 14578               | 13702                            | 3049                   | 2888                                | 5784.4                    | 0.527                     |
| <b>FP13</b>        | 14949               | 13979                            | 2957                   | 2801                                | 5373.1                    | 0.550                     |
| <b>FP21</b>        | 16745               | 15412                            | 2350                   | 2172                                | 5297.2                    | 0.444                     |
| <b>FP22</b>        | 15183               | 14164                            | 2166                   | 2039                                | 4680.8                    | 0.463                     |
| <b>FP23</b>        | 17800               | 16667                            | 2413                   | 2248                                | 5085.8                    | 0.474                     |
| <b>FP31</b>        | 16177               | 15523                            | 2828                   | 2724                                | 5191.2                    | 0.545                     |
| <b>FP32</b>        | 15115               | 14443                            | 2795                   | 2688                                | 5174.5                    | 0.540                     |
| <b>FP33</b>        | 18184               | 16935                            | 3187                   | 3001                                | 6172.2                    | 0.516                     |
| <b>FC11</b>        | 14100               | 13464                            | 2733                   | 2583                                | 5304.7                    | 0.515                     |
| <b>FC12</b>        | 12335               | 11743                            | 2586                   | 2460                                | 5007.8                    | 0.516                     |
| <b>FC13</b>        | 12804               | 12211                            | 2695                   | 2563                                | 5075.8                    | 0.531                     |
| <b>FC21</b>        | 16123               | 15353                            | 2778                   | 2684                                | 4952.4                    | 0.561                     |
| <b>FC22</b>        | 14749               | 14140                            | 2680                   | 2574                                | 4994.0                    | 0.537                     |
| <b>FC23</b>        | 17292               | 16118                            | 2996                   | 2847                                | 5694.8                    | 0.526                     |
| <b>FC31</b>        | 18116               | 15853                            | 3199                   | 2787                                | 7434.8                    | 0.430                     |
| <b>FC32</b>        | 16418               | 15109                            | 2626                   | 2459                                | 5665.9                    | 0.463                     |
| <b>FC33</b>        | 20393               | 18535                            | 2932                   | 2720                                | 6103.2                    | 0.480                     |
| <b>HP11</b>        | 16586               | 15376                            | 2990                   | 2809                                | 6520.5                    | 0.459                     |
| <b>HP12</b>        | 16651               | 15197                            | 2942                   | 2734                                | 6360.4                    | 0.463                     |
| <b>HP13</b>        | 16385               | 14878                            | 2818                   | 2597                                | 5995.3                    | 0.470                     |
| <b>HP21</b>        | 11295               | 10323                            | 2435                   | 2288                                | 5621.5                    | 0.433                     |
| <b>HP22</b>        | 17105               | 15320                            | 3350                   | 3049                                | 7380.8                    | 0.454                     |
| <b>HP23</b>        | 14833               | 13393                            | 3168                   | 2923                                | 6795.1                    | 0.466                     |
| <b>HP31</b>        | 15772               | 14558                            | 3131                   | 2928                                | 6501.7                    | 0.482                     |
| <b>HP32</b>        | 15829               | 14447                            | 3164                   | 2903                                | 6728.4                    | 0.470                     |
| <b>HP33</b>        | 16175               | 14853                            | 3260                   | 3031                                | 6494.9                    | 0.502                     |
| <b>HC11</b>        | 17631               | 15887                            | 3838                   | 3454                                | 8081.2                    | 0.475                     |
| <b>HC12</b>        | 17940               | 16420                            | 3738                   | 3407                                | 7834.4                    | 0.477                     |
| <b>HC13</b>        | 15959               | 14017                            | 3469                   | 3114                                | 7819.9                    | 0.444                     |
| <b>HC21</b>        | 15416               | 14400                            | 3518                   | 3285                                | 6975.3                    | 0.504                     |
| <b>HC22</b>        | 17906               | 16385                            | 3732                   | 3391                                | 7481.5                    | 0.499                     |
| <b>HC23</b>        | 16604               | 14954                            | 3657                   | 3270                                | 7202.5                    | 0.508                     |
| <b>HC31</b>        | 17668               | 16163                            | 3212                   | 2955                                | 6615.5                    | 0.486                     |

|             |          |          |         |         |        |       |
|-------------|----------|----------|---------|---------|--------|-------|
| <b>HC32</b> | 18773    | 16864    | 3384    | 3065    | 7410.0 | 0.457 |
| <b>FC33</b> | 18079    | 16283    | 3390    | 3083    | 7177.5 | 0.472 |
| <b>YP11</b> | 18068    | 16253    | 2991    | 2717    | 6569.5 | 0.455 |
| <b>YP12</b> | 20179    | 18156    | 3287    | 2979    | 6941.9 | 0.474 |
| <b>YP13</b> | 20798    | 18684    | 3363    | 3036    | 7163.2 | 0.469 |
| <b>YP21</b> | 20007    | 17986    | 2741    | 2495    | 6127.8 | 0.447 |
| <b>YP22</b> | 13615    | 12448    | 2140    | 2022    | 4366.0 | 0.490 |
| <b>YP23</b> | 16997    | 15373    | 2480    | 2293    | 5620.8 | 0.441 |
| <b>YP31</b> | 17605    | 15961    | 2950    | 2729    | 5797.9 | 0.509 |
| <b>YP32</b> | 20636    | 18648    | 3389    | 3065    | 7275.9 | 0.466 |
| <b>YP33</b> | 15909    | 14370    | 2954    | 2684    | 6282.3 | 0.470 |
| <b>YC11</b> | 17456    | 15998    | 3278    | 2977    | 7178.5 | 0.457 |
| <b>YC12</b> | 17694    | 16308    | 3204    | 2940    | 6814.9 | 0.470 |
| <b>YC13</b> | 16666    | 15090    | 3241    | 2947    | 6951.7 | 0.466 |
| <b>YC21</b> | 20574    | 18623    | 3574    | 3195    | 7163.3 | 0.499 |
| <b>YC22</b> | 20078    | 18161    | 3495    | 3122    | 7569.0 | 0.462 |
| <b>YC23</b> | 16015    | 14739    | 3150    | 2868    | 6796.1 | 0.463 |
| <b>YC31</b> | 18336    | 16585    | 3490    | 3096    | 7612.3 | 0.458 |
| <b>YC32</b> | 19455    | 17746    | 3469    | 3096    | 7278.6 | 0.477 |
| <b>YC33</b> | 13442    | 12131    | 2922    | 2622    | 6672.6 | 0.438 |
| Average     | 16751.54 | 15348.69 | 3060.37 | 2818.85 | 6368.8 | 0.483 |
| Stdv        | 2188.19  | 1862.07  | 398.14  | 329.56  | 941.7  | 0.032 |
| Subtotal    | 904583   | 828829   | 27774   | 14732   | 52502  | 0.529 |
