# Supplementary material for: Evaluation of the reproducibility of amplicon sequencing with Illumina MiSeq platform
Source: PubMed Central journal article supplement (PMC5409056; doi:10.1371/journal.pone.0176716), 2017-04-28
Supplement: pone.0176716.s009.pdf [file pone.0176716.s009.pdf]

**S4 Table.** Summary of sequencing statistics for experiment II

| Tagged PCR Library | MiSeq Run | Total raw sequences | Effective sequences for analysis | # of OTUs (97% cutoff) | # of OTUs after removing singletons | Predicted # OTUs by Chao1 |                           |
|--------------------|-----------|---------------------|----------------------------------|------------------------|-------------------------------------|---------------------------|---------------------------|
|                    |           |                     |                                  |                        |                                     | Number                    | Coverage of observed OTUs |
| FP11               | 1         | 11390               | 10684                            | 2809                   | 2630                                | 5277.2                    | 0.532                     |
| FP12               | 2         | 11419               | 10435                            | 2689                   | 2542                                | 5111.3                    | 0.526                     |
| FP13               | 3         | 8661                | 7911                             | 2307                   | 2192                                | 4290.4                    | 0.538                     |
| FP21               | 1         | 13322               | 11849                            | 2056                   | 1939                                | 3960.6                    | 0.519                     |
| FP22               | 2         | 11705               | 10505                            | 1793                   | 1709                                | 3681.3                    | 0.487                     |
| FP23               | 3         | 7666                | 6844                             | 1342                   | 1289                                | 3149.1                    | 0.426                     |
| FP31               | 1         | 15878               | 15277                            | 3216                   | 3023                                | 5616.5                    | 0.573                     |
| FP32               | 2         | 9545                | 9166                             | 2311                   | 2209                                | 4199.7                    | 0.550                     |
| FP33               | 3         | 4161                | 4130                             | 1447                   | 1413                                | 2868.8                    | 0.504                     |
| FC11               | 1         | 16058               | 14980                            | 3127                   | 2921                                | 5297.8                    | 0.590                     |
| FC12               | 2         | 8061                | 7654                             | 2111                   | 2008                                | 4226.8                    | 0.499                     |
| FC13               | 3         | 6189                | 5868                             | 1822                   | 1742                                | 3579.2                    | 0.509                     |
| FC21               | 1         | 13245               | 12262                            | 2658                   | 2527                                | 4956.6                    | 0.536                     |
| FC22               | 2         | 6185                | 5725                             | 1554                   | 1492                                | 3288.4                    | 0.473                     |
| FC23               | 3         | 7265                | 6713                             | 1764                   | 1684                                | 3516.9                    | 0.502                     |
| FC31               | 1         | 14498               | 14189                            | 2648                   | 2543                                | 4865.4                    | 0.544                     |
| FC32               | 2         | 10671               | 10399                            | 2100                   | 2046                                | 3927.8                    | 0.535                     |
| FC33               | 3         | 10691               | 9840                             | 1977                   | 1898                                | 4109.3                    | 0.481                     |
| HP11               | 1         | 14459               | 12821                            | 2844                   | 2611                                | 6174.8                    | 0.461                     |
| HP12               | 2         | 10874               | 10084                            | 2350                   | 2219                                | 4867.7                    | 0.483                     |
| HP13               | 3         | 7983                | 7444                             | 2001                   | 1912                                | 4144.1                    | 0.483                     |
| HP21               | 1         | 10051               | 9240                             | 2486                   | 2347                                | 5013.0                    | 0.496                     |
| HP22               | 2         | 5102                | 4513                             | 1500                   | 1419                                | 3909.5                    | 0.384                     |
| HP23               | 3         | 5940                | 5495                             | 1661                   | 1586                                | 3619.6                    | 0.459                     |
| HP31               | 1         | 11527               | 10649                            | 2717                   | 2534                                | 5417.4                    | 0.502                     |
| HP32               | 2         | 7512                | 6963                             | 1941                   | 1837                                | 3896.5                    | 0.498                     |
| HP33               | 3         | 10156               | 9206                             | 2222                   | 2099                                | 4696.2                    | 0.473                     |
| HC11               | 1         | 13020               | 11210                            | 3090                   | 2804                                | 6231.3                    | 0.496                     |
| HC12               | 2         | 9956                | 9027                             | 2589                   | 2426                                | 5059.6                    | 0.512                     |
| HC13               | 3         | 7739                | 7066                             | 2266                   | 2133                                | 4725.3                    | 0.480                     |
| HC21               | 1         | 9422                | 8664                             | 2672                   | 2456                                | 5382.8                    | 0.496                     |
| HC22               | 2         | 5966                | 5385                             | 1900                   | 1781                                | 4064.7                    | 0.467                     |

|             |   |         |        |        |        |        |       |
|-------------|---|---------|--------|--------|--------|--------|-------|
| <b>HC23</b> | 3 | 5381    | 4973   | 1771   | 1671   | 3918.0 | 0.452 |
| <b>HC31</b> | 1 | 11576   | 10562  | 2722   | 2531   | 5552.7 | 0.490 |
| <b>HC32</b> | 2 | 8447    | 7643   | 2103   | 1992   | 5099.0 | 0.412 |
| <b>FC33</b> | 3 | 11209   | 10174  | 2446   | 2279   | 5184.7 | 0.472 |
| <b>YP11</b> | 1 | 13578   | 12137  | 2416   | 2240   | 4633.6 | 0.521 |
| <b>YP12</b> | 2 | 9491    | 8926   | 1904   | 1825   | 3449.0 | 0.552 |
| <b>YP13</b> | 3 | 7461    | 7042   | 1654   | 1578   | 3402.6 | 0.486 |
| <b>YP21</b> | 1 | 11694   | 10474  | 1806   | 1686   | 3756.3 | 0.481 |
| <b>YP22</b> | 2 | 9830    | 8996   | 1639   | 1582   | 3315.6 | 0.494 |
| <b>YP23</b> | 3 | 6940    | 6326   | 1238   | 1187   | 2920.8 | 0.424 |
| <b>YP31</b> | 1 | 11495   | 10428  | 2276   | 1705   | 4540.1 | 0.501 |
| <b>YP32</b> | 2 | 8566    | 7773   | 1821   | 2088   | 3786.1 | 0.481 |
| <b>YP33</b> | 3 | 10221   | 9230   | 1911   | 1817   | 4005.3 | 0.477 |
| <b>YC11</b> | 1 | 13361   | 11958  | 2637   | 2450   | 4732.6 | 0.557 |
| <b>YC12</b> | 2 | 6601    | 6181   | 1707   | 1644   | 3570.8 | 0.478 |
| <b>YC13</b> | 3 | 5118    | 4759   | 1438   | 1393   | 2880.7 | 0.499 |
| <b>YC21</b> | 1 | 17606   | 16059  | 3182   | 2925   | 5592.9 | 0.569 |
| <b>YC22</b> | 2 | 12231   | 10973  | 2339   | 2203   | 4461.9 | 0.524 |
| <b>YC23</b> | 3 | 8679    | 7947   | 1955   | 1866   | 3820.6 | 0.512 |
| <b>YC31</b> | 1 | 16731   | 15395  | 3046   | 2806   | 5449.5 | 0.559 |
| <b>YC32</b> | 2 | 12406   | 11423  | 2408   | 2271   | 4480.8 | 0.537 |
| <b>YC33</b> | 3 | 8965    | 8046   | 1909   | 1811   | 3801.0 | 0.502 |
| Average     |   | 10072.3 | 9252.3 | 2190.7 | 2065.2 | 4360.7 | 0.500 |
| Stdv        |   | 3174.81 | 2912.1 | 507.7  | 456.3  | 846.7  | 0.040 |
| Subtotal    |   | 543904  | 499623 | 17107  | 10330  | 28570  | 0.599 |
