# Supplementary material for: Evaluation of the reproducibility of amplicon sequencing with Illumina MiSeq platform
Source: PubMed Central journal article supplement (PMC5409056; doi:10.1371/journal.pone.0176716), 2017-04-28
Supplement: pone.0176716.s010.pdf [file pone.0176716.s010.pdf]

**S5 Table.** OTU overlaps <sup>a</sup> between/among technical replicates for experiment I

| Soil Sample | With singletons    |                    | Singletons removed |                    |
|-------------|--------------------|--------------------|--------------------|--------------------|
|             | Two tags           | Three tags         | Two tags           | Three tags         |
| FP1         | 0.366±0.008        | 0.228              | 0.392±0.001        | 0.247              |
| FP2         | 0.314±0.009        | 0.185              | 0.338±0.006        | 0.199              |
| FP3         | 0.360±0.004        | 0.220              | 0.377±0.003        | 0.235              |
| FC1         | 0.364±0.006        | 0.225              | 0.391±0.005        | 0.248              |
| FC2         | 0.376±0.011        | 0.237              | 0.383±0.013        | 0.238              |
| FC3         | 0.299±0.019        | 0.174              | 0.330±0.010        | 0.195              |
| HP1         | 0.324±0.007        | 0.191              | 0.350±0.009        | 0.210              |
| HP2         | 0.327±0.005        | 0.197              | 0.359±0.007        | 0.218              |
| HP3         | 0.335±0.002        | 0.204              | 0.368±0.001        | 0.226              |
| HC1         | 0.320±0.010        | 0.189              | 0.359±0.005        | 0.215              |
| HC2         | 0.342±0.010        | 0.208              | 0.383±0.007        | 0.239              |
| HC3         | 0.320±0.004        | 0.187              | 0.349±0.002        | 0.208              |
| YP1         | 0.320±0.003        | 0.189              | 0.351±0.003        | 0.211              |
| YP2         | 0.327±0.004        | 0.196              | 0.346±0.010        | 0.206              |
| YP3         | 0.327±0.011        | 0.198              | 0.355±0.003        | 0.211              |
| YC1         | 0.338±0.001        | 0.208              | 0.376±0.006        | 0.236              |
| YC2         | 0.327±0.011        | 0.195              | 0.370±0.007        | 0.227              |
| YC3         | 0.330±0.003        | 0.199              | 0.370±0.005        | 0.228              |
| Average     | <b>0.334±0.021</b> | <b>0.202±0.017</b> | <b>0.364±0.019</b> | <b>0.222±0.016</b> |

<sup>a</sup> Before the OTU overlaps were calculated, each sample was rarefied at the level of 10323 sequences, the least sequence number of the 54 libraries.
