# Supplementary material for: Evaluation of the reproducibility of amplicon sequencing with Illumina MiSeq platform
Source: PubMed Central journal article supplement (PMC5409056; doi:10.1371/journal.pone.0176716), 2017-04-28
Supplement: pone.0176716.s011.pdf [file pone.0176716.s011.pdf]

**S6 Table.** OTU overlaps between/among technical replicates for experiment II

| Soil Sample | With singletons    |                    | Removing singletons |                    |
|-------------|--------------------|--------------------|---------------------|--------------------|
|             | Two tags           | Three tags         | Two tags            | Three tags         |
| FP1         | 0.312±0.011        | 0.175              | 0.325±0.011         | 0.178              |
| FP2         | 0.290±0.011        | 0.160              | 0.310±0.005         | 0.179              |
| FP3         | 0.315±0.012        | 0.180              | 0.334±0.004         | 0.192              |
| FC1         | 0.319±0.009        | 0.185              | 0.340±0.009         | 0.201              |
| FC2         | 0.315±0.003        | 0.183              | 0.329±0.005         | 0.192              |
| FC3         | 0.319±0.014        | 0.179              | 0.313±0.022         | 0.172              |
| HP1         | 0.284±0.013        | 0.157              | 0.298±0.014         | 0.161              |
| HP2         | 0.284±0.010        | 0.154              | 0.311±0.009         | 0.174              |
| HP3         | 0.292±0.010        | 0.164              | 0.305±0.004         | 0.166              |
| HC1         | 0.298±0.011        | 0.163              | 0.321±0.017         | 0.181              |
| HC2         | 0.298±0.004        | 0.169              | 0.319±0.011         | 0.181              |
| HC3         | 0.292±0.010        | 0.165              | 0.305±0.006         | 0.169              |
| YP1         | 0.313±0.012        | 0.180              | 0.321±0.015         | 0.179              |
| YP2         | 0.304±0.011        | 0.174              | 0.328±0.013         | 0.192              |
| YP3         | 0.309±0.003        | 0.179              | 0.326±0.014         | 0.192              |
| YC1         | 0.331±0.009        | 0.191              | 0.348±0.011         | 0.207              |
| YC2         | 0.312±0.004        | 0.181              | 0.334±0.004         | 0.196              |
| YC3         | 0.321±0.017        | 0.186              | 0.327±0.008         | 0.188              |
| Average     | <b>0.306±0.016</b> | <b>0.174±0.011</b> | <b>0.322±0.016</b>  | <b>0.183±0.012</b> |

<sup>a</sup> Before the OTU overlaps were calculated, each sample was rarefied at the level of 4130 sequences, the least sequence number of the 54 libraries.
