# Supplementary material for: Evaluation of the reproducibility of amplicon sequencing with Illumina MiSeq platform
Source: PubMed Central journal article supplement (PMC5409056; doi:10.1371/journal.pone.0176716), 2017-04-28
Supplement: pone.0176716.s012.pdf [file pone.0176716.s012.pdf]

**S7 Table.** Sequence abundance weighted OTU overlap between/among technical replicates for experiment I

| Soil Sample | With singletons     |                     | Removing singletons |                     |
|-------------|---------------------|---------------------|---------------------|---------------------|
|             | Two tags            | Three tags          | Two tags            | Three tags          |
| FP1         | 0.853 ±0.005        | 0.804               | 0.864 ±0.004        | 0.813               |
| FP2         | 0.888 ±0.003        | 0.855               | 0.898 ±0.002        | 0.865               |
| FP3         | 0.864 ±0.002        | 0.817               | 0.870 ±0.003        | 0.824               |
| FC1         | 0.861 ±0.004        | 0.816               | 0.872 ±0.004        | 0.829               |
| FC2         | 0.873 ±0.003        | 0.831               | 0.877 ±0.003        | 0.832               |
| FC3         | 0.859 ±0.015        | 0.821               | 0.871 ±0.011        | 0.832               |
| HP1         | 0.857 ±0.002        | 0.813               | 0.869 ±0.004        | 0.825               |
| HP2         | 0.844 ±0.005        | 0.798               | 0.859 ±0.005        | 0.812               |
| HP3         | 0.848 ±0.001        | 0.803               | 0.862 ±0.003        | 0.812               |
| HC1         | 0.824 ±0.005        | 0.772               | 0.844 ±0.003        | 0.788               |
| HC2         | 0.831 ±0.002        | 0.779               | 0.850 ±0.004        | 0.796               |
| HC3         | 0.848 ±0.000        | 0.801               | 0.862 ±0.001        | 0.815               |
| YP1         | 0.861 ±0.003        | 0.820               | 0.873 ±0.002        | 0.831               |
| YP2         | 0.886 ±0.001        | 0.852               | 0.891 ±0.002        | 0.853               |
| YP3         | 0.859 ±0.006        | 0.819               | 0.870 ±0.002        | 0.824               |
| YC1         | 0.854 ±0.001        | 0.811               | 0.869 ±0.004        | 0.826               |
| YC2         | 0.849 ±0.002        | 0.804               | 0.869 ±0.002        | 0.822               |
| YC3         | 0.847 ±0.002        | 0.801               | 0.864 ±0.002        | 0.816               |
| Average     | <b>0.856 ±0.016</b> | <b>0.812 ±0.021</b> | <b>0.869 ±0.013</b> | <b>0.823 ±0.018</b> |
