# Supplementary material for: Evaluation of the reproducibility of amplicon sequencing with Illumina MiSeq platform
Source: PubMed Central journal article supplement (PMC5409056; doi:10.1371/journal.pone.0176716), 2017-04-28
Supplement: pone.0176716.s013.pdf [file pone.0176716.s013.pdf]

**S8 Table.** Sequence abundance weighted OTU overlap between/among technical replicates for experiment II

| Soil Sample    | With singletons     |                     | Removing singletons |                     |
|----------------|---------------------|---------------------|---------------------|---------------------|
|                | Two tags            | Three tags          | Two tags            | Three tags          |
| FP1            | 0.750 ±0.012        | 0.670               | 0.753 ±0.010        | 0.661               |
| FP2            | 0.837 ±0.010        | 0.788               | 0.845 ±0.005        | 0.798               |
| FP3            | 0.764 ±0.012        | 0.688               | 0.775 ±0.004        | 0.697               |
| FC1            | 0.765 ±0.012        | 0.692               | 0.775 ±0.009        | 0.700               |
| FC2            | 0.778 ±0.015        | 0.715               | 0.787 ±0.011        | 0.721               |
| FC3            | 0.805 ±0.010        | 0.738               | 0.804 ±0.010        | 0.736               |
| HP1            | 0.773 ±0.005        | 0.709               | 0.779 ±0.008        | 0.707               |
| HP2            | 0.757 ±0.010        | 0.688               | 0.772 ±0.009        | 0.701               |
| HP3            | 0.768 ±0.009        | 0.701               | 0.776 ±0.006        | 0.701               |
| HC1            | 0.741 ±0.010        | 0.657               | 0.759 ±0.009        | 0.678               |
| HC2            | 0.738 ±0.005        | 0.661               | 0.752 ±0.007        | 0.673               |
| HC3            | 0.763 ±0.009        | 0.696               | 0.774 ±0.014        | 0.700               |
| YP1            | 0.809 ±0.009        | 0.753               | 0.813 ±0.012        | 0.748               |
| YP2            | 0.843 ±0.009        | 0.797               | 0.855 ±0.009        | 0.809               |
| YP3            | 0.802 ±0.007        | 0.743               | 0.816 ±0.009        | 0.759               |
| YC1            | 0.790 ±0.013        | 0.719               | 0.804 ±0.013        | 0.736               |
| YC2            | 0.788 ±0.013        | 0.725               | 0.797 ±0.009        | 0.732               |
| YC3            | 0.793 ±0.011        | 0.727               | 0.796 ±0.007        | 0.727               |
| <b>Average</b> | <b>0.781 ±0.031</b> | <b>0.715 ±0.039</b> | <b>0.791 ±0.029</b> | <b>0.721 ±0.040</b> |
