# Supplementary material for: Evaluation of the reproducibility of amplicon sequencing with Illumina MiSeq platform
Source: PubMed Central journal article supplement (PMC5409056; doi:10.1371/journal.pone.0176716), 2017-04-28
Supplement: pone.0176716.s014.pdf [file pone.0176716.s014.pdf]

**S9 Table.** Effect of removing unique OTUs after sequence resampling on OTU overlaps between/among technical replicates <sup>a</sup>

| Types of unique OTUs removed        | OTUs number <sup>b</sup> | Two tags      | Three tags    |
|-------------------------------------|--------------------------|---------------|---------------|
| No OTU removed                      | 14258                    | 0.3637±0.0186 | 0.2221±0.0162 |
| with ≤1 sequences removed           | 12324                    | 0.3716±0.0187 | 0.2280±0.0164 |
| with ≤2 sequences removed           | 12122                    | 0.3725±0.0189 | 0.2287±0.0166 |
| with ≤3 sequences removed           | 12108                    | 0.3726±0.0188 | 0.2287±0.0166 |
| with ≤4 sequences removed           | 12107                    | 0.3726±0.0188 | 0.2287±0.0165 |
| with <b>all</b> unique OTUs removed | 12107                    | 0.3726±0.0188 | 0.2287±0.0165 |

<sup>a</sup> OTUs were generated using Uclust at 97% similarity, and the data in this table is for the experiment I. Singletons were removed before sequence resampling.

<sup>b</sup> Before resampling, the OTUs number from OTU tables with and without singletons were 27774 and 14732, respectively. The OTUs numbers in the above table excluded the OTUs without any sequence which were resulted from resampling.
