# Supplementary material for: Evaluation of the reproducibility of amplicon sequencing with Illumina MiSeq platform
Source: PubMed Central journal article supplement (PMC5409056; doi:10.1371/journal.pone.0176716), 2017-04-28
Supplement: pone.0176716.s015.pdf [file pone.0176716.s015.pdf]

**S10 Table.** OTU overlaps between/among technical replicates at different sequencing depth <sup>b</sup>

| # of Sequences Resampled <sup>c</sup> | With singletons |               |               | Without singletons |               |               |
|---------------------------------------|-----------------|---------------|---------------|--------------------|---------------|---------------|
|                                       | # of Total OTU  | OTUs overlap  |               | # of Total OTU     | OTUs overlap  |               |
|                                       |                 | Between       | Among         |                    | Between       | Among         |
| <b>160000</b>                         | 24745           | <b>0.4391</b> | <b>0.3045</b> | 14399              | <b>0.6650</b> | <b>0.5257</b> |
| <b>150000</b>                         | 24088           | <b>0.4386</b> | <b>0.3039</b> | 14362              | <b>0.6553</b> | <b>0.5150</b> |
| <b>120000</b>                         | 21862           | <b>0.4331</b> | <b>0.2970</b> | 14018              | <b>0.6130</b> | <b>0.4685</b> |
| <b>100000</b>                         | 20129           | <b>0.4263</b> | <b>0.2902</b> | 13647              | <b>0.5875</b> | <b>0.4413</b> |
| <b>80000</b>                          | 18158           | <b>0.4222</b> | <b>0.2862</b> | 13018              | <b>0.5544</b> | <b>0.4054</b> |
| <b>60000</b>                          | 15813           | <b>0.4163</b> | <b>0.2793</b> | 12141              | <b>0.5173</b> | <b>0.3678</b> |
| <b>50000</b>                          | 14615           | <b>0.4073</b> | <b>0.2707</b> | 11366              | <b>0.5040</b> | <b>0.3554</b> |
| <b>30000</b>                          | 11341           | <b>0.3896</b> | <b>0.2529</b> | 9510               | <b>0.4541</b> | <b>0.3068</b> |
| <b>20000</b>                          | 9328            | <b>0.3668</b> | <b>0.2311</b> | 8087               | <b>0.4161</b> | <b>0.2686</b> |
| <b>10000</b>                          | 6531            | <b>0.3199</b> | <b>0.1877</b> | 5953               | <b>0.3528</b> | <b>0.2110</b> |
| <b>5000</b>                           | 4309            | <b>0.2873</b> | <b>0.1592</b> | 4098               | <b>0.2985</b> | <b>0.1635</b> |
| <b>2000</b>                           | 2501            | <b>0.2067</b> | <b>0.1004</b> | 2339               | <b>0.2262</b> | <b>0.1116</b> |
| <b>1000</b>                           | 1540            | <b>0.1641</b> | <b>0.0708</b> | 1514               | <b>0.1706</b> | <b>0.0740</b> |
| <b>500</b>                            | 892             | <b>0.1281</b> | <b>0.0493</b> | 899                | <b>0.1378</b> | <b>0.0534</b> |
| <b>200</b>                            | 437             | <b>0.0813</b> | <b>0.0275</b> | 429                | <b>0.0863</b> | <b>0.0256</b> |
| <b>100</b>                            | 230             | <b>0.0688</b> | <b>0.0261</b> | 239                | <b>0.0527</b> | <b>0.0167</b> |

<sup>a</sup> Jaccard overlap, not considering sequence abundances of OTUs.

<sup>b</sup> One soil sample were tagged three times and deep sequenced. More than 160,000 sequences were obtained for each tagged PCR library.

<sup>c</sup> Sequence resampling was done after OTUs were generated.
