# Supplementary material for: Evaluation of the reproducibility of amplicon sequencing with Illumina MiSeq platform
Source: PubMed Central journal article supplement (PMC5409056; doi:10.1371/journal.pone.0176716), 2017-04-28
Supplement: pone.0176716.s016.pdf [file pone.0176716.s016.pdf]

**S11 Table.** Sequence abundance weighted OTU overlap between/among technical replicates at different sequence depth

| # of Sequences resampled | With singletons |                   |                  | Without singletons |                   |                  |
|--------------------------|-----------------|-------------------|------------------|--------------------|-------------------|------------------|
|                          | # of OTU        | Sequences overlap |                  | OTU#               | Sequences overlap |                  |
|                          |                 | Between two tags  | Among three tags |                    | Between two tags  | Among three tags |
| 160000                   | 24745           | <b>0.9530</b>     | <b>0.9379</b>    | 14399              | <b>0.9742</b>     | <b>0.9587</b>    |
| 150000                   | 24088           | <b>0.9513</b>     | <b>0.9357</b>    | 14362              | <b>0.9729</b>     | <b>0.9570</b>    |
| 120000                   | 21862           | <b>0.9448</b>     | <b>0.9267</b>    | 14018              | <b>0.9665</b>     | <b>0.9487</b>    |
| 100000                   | 20129           | <b>0.9385</b>     | <b>0.9185</b>    | 13647              | <b>0.9608</b>     | <b>0.9409</b>    |
| 80000                    | 18158           | <b>0.9309</b>     | <b>0.9085</b>    | 13018              | <b>0.9525</b>     | <b>0.9296</b>    |
| 60000                    | 15813           | <b>0.9192</b>     | <b>0.8924</b>    | 12141              | <b>0.9391</b>     | <b>0.9117</b>    |
| 50000                    | 14615           | <b>0.9105</b>     | <b>0.8814</b>    | 11366              | <b>0.9329</b>     | <b>0.9037</b>    |
| 30000                    | 11341           | <b>0.8819</b>     | <b>0.8433</b>    | 9510               | <b>0.9025</b>     | <b>0.8640</b>    |
| 20000                    | 9328            | <b>0.8511</b>     | <b>0.8035</b>    | 8087               | <b>0.8716</b>     | <b>0.8218</b>    |
| 10000                    | 6531            | <b>0.7849</b>     | <b>0.7203</b>    | 5953               | <b>0.8027</b>     | <b>0.7348</b>    |
| 5000                     | 4309            | <b>0.7140</b>     | <b>0.6317</b>    | 4098               | <b>0.7238</b>     | <b>0.6363</b>    |
| 2000                     | 2501            | <b>0.5668</b>     | <b>0.4705</b>    | 2339               | <b>0.5957</b>     | <b>0.4960</b>    |
| 1000                     | 1540            | <b>0.4672</b>     | <b>0.3630</b>    | 1514               | <b>0.4708</b>     | <b>0.3610</b>    |
| 500                      | 892             | <b>0.3807</b>     | <b>0.2760</b>    | 899                | <b>0.3817</b>     | <b>0.2733</b>    |
| 200                      | 437             | <b>0.2542</b>     | <b>0.1717</b>    | 429                | <b>0.2433</b>     | <b>0.1450</b>    |
| 100                      | 230             | <b>0.2033</b>     | <b>0.1267</b>    | 239                | <b>0.1867</b>     | <b>0.1333</b>    |
