# Supplementary material for: Evaluation of the reproducibility of amplicon sequencing with Illumina MiSeq platform
Source: PubMed Central journal article supplement (PMC5409056; doi:10.1371/journal.pone.0176716), 2017-04-28
Supplement: pone.0176716.s017.pdf [file pone.0176716.s017.pdf]

**S12 Table.** OTU overlaps between/among technical replicates at different sequencing depth with OTUs generated by UPARSE

| # of Sequences resampled | With singletons |               |               | Without singletons |               |               |
|--------------------------|-----------------|---------------|---------------|--------------------|---------------|---------------|
|                          | # of Total OTU  | OTUs overlap  |               | # of Total OTU     | OTUs overlap  |               |
|                          |                 | Between       | Among         |                    | Between two   | Among         |
| <b>120000</b>            | 8309            | <b>0.5786</b> | <b>0.4445</b> | 4270               | <b>0.7929</b> | <b>0.6988</b> |
| <b>100000</b>            | 7869            | <b>0.5694</b> | <b>0.4337</b> | 4242               | <b>0.7605</b> | <b>0.6558</b> |
| <b>80000</b>             | 7342            | <b>0.5572</b> | <b>0.4203</b> | 4168               | <b>0.7251</b> | <b>0.6101</b> |
| <b>60000</b>             | 6674            | <b>0.5465</b> | <b>0.4093</b> | 4055               | <b>0.6855</b> | <b>0.5618</b> |
| <b>50000</b>             | 6336            | <b>0.5273</b> | <b>0.3868</b> | 3897               | <b>0.6605</b> | <b>0.5309</b> |
| <b>30000</b>             | 5277            | <b>0.5014</b> | <b>0.3597</b> | 3543               | <b>0.6010</b> | <b>0.4629</b> |
| <b>20000</b>             | 4516            | <b>0.4815</b> | <b>0.3364</b> | 3186               | <b>0.5551</b> | <b>0.4109</b> |
| <b>10000</b>             | 3429            | <b>0.4236</b> | <b>0.2794</b> | 2529               | <b>0.4914</b> | <b>0.3416</b> |
| <b>5000</b>              | 2513            | <b>0.3840</b> | <b>0.2415</b> | 1934               | <b>0.4164</b> | <b>0.2725</b> |
| <b>2000</b>              | 1535            | <b>0.2980</b> | <b>0.1668</b> | 1231               | <b>0.3483</b> | <b>0.2088</b> |
| <b>1000</b>              | 1029            | <b>0.2442</b> | <b>0.1244</b> | 900                | <b>0.2689</b> | <b>0.1422</b> |
| <b>500</b>               | 692             | <b>0.1885</b> | <b>0.0882</b> | 575                | <b>0.2258</b> | <b>0.1148</b> |
| <b>200</b>               | 333             | <b>0.1445</b> | <b>0.0571</b> | 328                | <b>0.1510</b> | <b>0.0579</b> |
| <b>100</b>               | 193             | <b>0.0784</b> | <b>0.0207</b> | 197                | <b>0.1127</b> | <b>0.0406</b> |
