# Supplementary material for: Evaluation of the reproducibility of amplicon sequencing with Illumina MiSeq platform
Source: PubMed Central journal article supplement (PMC5409056; doi:10.1371/journal.pone.0176716), 2017-04-28
Supplement: pone.0176716.s018.pdf [file pone.0176716.s018.pdf]

**S13 Table.** Three-way ANOVA <sup>a</sup> to assess alpha diversities <sup>b</sup> at different levels for experiment II.

|                     | Df | Shannon measurement (H') |                |                    |         | Number of OTUs  |          |                    |           | Pielou evenness (J) |           |                    |         |
|---------------------|----|--------------------------|----------------|--------------------|---------|-----------------|----------|--------------------|-----------|---------------------|-----------|--------------------|---------|
|                     |    | With singletons          |                | Singletons removed |         | With singletons |          | Singletons removed |           | With singletons     |           | Singletons removed |         |
|                     |    | F <sup>c</sup>           | P <sup>d</sup> | F                  | P       | F               | P        | F                  | P         | F                   | P         | F                  | P       |
| Technical replicate | 2  | 1.343                    | 0.271          | 1.262              | 0.292   | 2.771           | 0.073    | 2.085              | 0.135     | 1.011               | 0.371     | 1.062              | 0.354   |
| Location            | 2  | 6.389                    | 0.003**        | 5.625              | 0.006** | 12.702          | 4.E-05** | 10.681             | 1.5E-04** | 4.904               | 0.012*    | 4.36               | 0.018*  |
| Treatment           | 1  | 14.116                   | 4.7E-04**      | 12.674             | 0.001** | 9.667           | 0.003**  | 8.506              | 0.005**   | 15.301              | 2.9E-04** | 13.80              | 0.001** |
| Residuals           | 48 |                          |                |                    |         |                 |          |                    |           |                     |           |                    |         |

<sup>a</sup> The model used for the three-way ANOVA:  $(\alpha \text{ diversity})_{ijk} = (\text{technical replicate})_i + (\text{location})_j + (\text{treatment})_k + (\text{error})_{ijk}$ .

<sup>b</sup> The Shannon entropy index, number of OTUs, and the Pielou evenness were used to measure the alpha diversity for each tagged PCR library.

<sup>c</sup> F-value

<sup>d</sup> P-value (>F)

\* p<0.05

\*\* p<0.01
