# Supplementary material for: Evaluation of the reproducibility of amplicon sequencing with Illumina MiSeq platform
Source: PubMed Central journal article supplement (PMC5409056; doi:10.1371/journal.pone.0176716), 2017-04-28
Supplement: pone.0176716.s019.pdf [file pone.0176716.s019.pdf]

**S14 Table.** One-way ANOVA and Duncan grouping to assess  $\beta$ -diversity at different levels based on OTUs for experiment II.

|                                                         | Data size <sup>a</sup> | With singletons                |                           |                                |                           | Singletons removed             |                           |                                |                           |
|---------------------------------------------------------|------------------------|--------------------------------|---------------------------|--------------------------------|---------------------------|--------------------------------|---------------------------|--------------------------------|---------------------------|
|                                                         |                        | Sorensen                       |                           | Bray-Curtis                    |                           | Sorensen                       |                           | Bray-Curtis                    |                           |
|                                                         |                        | $\beta$ diversity <sup>b</sup> | Significance <sup>c</sup> | $\beta$ diversity <sup>b</sup> | Significance <sup>c</sup> | $\beta$ diversity <sup>b</sup> | Significance <sup>c</sup> | $\beta$ diversity <sup>b</sup> | Significance <sup>c</sup> |
| At technical replicate level                            | 54                     | 0.531                          | d                         | 0.361                          | d                         | 0.513                          | e                         | 0.354                          | d                         |
| At biological replicate level within runs               | 54                     | 0.554                          | c                         | 0.434                          | c                         | 0.535                          | d                         | 0.425                          | c                         |
| At biological replicate level among runs                | 108                    | 0.558                          | c                         | 0.442                          | c                         | 0.541                          | d                         | 0.436                          | c                         |
| Between treatments (Planted/unplanted) within locations | 243                    | 0.588                          | b                         | 0.489                          | b                         | 0.572                          | c                         | 0.482                          | b                         |
| Among planted across locations                          | 243                    | 0.646                          | a                         | 0.561                          | a                         | 0.630                          | b                         | 0.556                          | a                         |
| Among unplanted across locations                        | 243                    | 0.651                          | a                         | 0.568                          | a                         | 0.639                          | a                         | 0.564                          | a                         |

<sup>a</sup> Data sizes (n) are the number of data points of the pairwise comparisons within the technical replicates, biological replicates, or treatments.

<sup>b</sup> We calculate two popular  $\beta$ -diversity dissimilarity measurements, Sorensen and Bray-Curtis, in which Sorensen dissimilarity is based on OTUs richness and Bray-Curtis dissimilarity takes OTUs abundance into account.

<sup>c</sup> Significance at [pr(>F)] <0.05, using Duncan grouping method. a, b, c, d and e represent the significance of the  $\beta$ -diversity differences between technical replicates, biological replicates, and the treatments. a marks the highest  $\beta$ -diversity, the one less than the highest but not significant is still marked with a, then the ones significantly lower than the highest is marked with b, c, d, or e.
