# Supplementary material for: Evaluation of the reproducibility of amplicon sequencing with Illumina MiSeq platform
Source: PubMed Central journal article supplement (PMC5409056; doi:10.1371/journal.pone.0176716), 2017-04-28
Supplement: pone.0176716.s020.pdf [file pone.0176716.s020.pdf]

**S15 Table.** Comparison of dispersions between observed technical replicates and those between null replicates <sup>a</sup> by permutation test of multivariate homogeneity of groups dispersions (PERMDISP).

| Sample <sup>a</sup> | Sorensen (unweighted)     |                |                | Bray-Curtis (abundance-weighted) |                |                |
|---------------------|---------------------------|----------------|----------------|----------------------------------|----------------|----------------|
|                     | $\Delta d\%$ <sup>c</sup> | F <sup>d</sup> | P <sup>e</sup> | $\Delta d\%$ <sup>c</sup>        | F <sup>d</sup> | P <sup>e</sup> |
| FP1                 | 31±2%                     | 3688±5425      | 0.001          | 15±2%                            | 108±41         | 0.001          |
| FP2                 | 31±3%                     | 562±185        | 0.001          | 22±1%                            | 67±12          | 0.001          |
| FP3                 | 31±1%                     | 1614±930       | 0.001          | 18±2%                            | 61±15          | 0.001          |
| FC1                 | 29±2%                     | 409±87         | 0.001          | 16±1%                            | 49±10          | 0.001          |
| FC2                 | 31±1%                     | 151±61         | 0.001          | 20±1%                            | 138±8          | 0.001          |
| FC3                 | 33±3%                     | 317±86         | 0.001          | 35±2%                            | 10±1           | 0.001          |
| HC1                 | 28±2%                     | 696±391        | 0.001          | 17±1%                            | 96±23          | 0.001          |
| HC2                 | 27±2%                     | 358±179        | 0.001          | 17±2%                            | 31±6           | 0.001          |
| HC3                 | 31±1%                     | 752±585        | 0.001          | 17±2%                            | 44±13          | 0.001          |
| HP1                 | 31±2%                     | 245±89         | 0.001          | 20±2%                            | 25±5           | 0.001          |
| HP2                 | 30±1%                     | 355±142        | 0.001          | 24±2%                            | 587±262        | 0.001          |
| HP3                 | 30±2%                     | 1629±1040      | 0.001          | 16±2%                            | 24±6           | 0.001          |
| YC1                 | 30±1%                     | 488±230        | 0.001          | 13±1%                            | 115±70         | 0.001          |
| YC2                 | 29±1%                     | 378±195        | 0.001          | 17±1%                            | 24±2           | 0.001          |
| YC3                 | 29±1%                     | 581±456        | 0.001          | 13±1%                            | 50±16          | 0.001          |
| YP1                 | 30±2%                     | 606±461        | 0.001          | 16±0%                            | 45±9           | 0.001          |
| YP2                 | 32±3%                     | 254±48         | 0.001          | 18±1%                            | 43±7           | 0.001          |
| YP3                 | 31±2%                     | 1483±784       | 0.001          | 17±2%                            | 196±45         | 0.001          |

<sup>a</sup> Each sample has three technical replicates;

<sup>b</sup> The null replicates are about to simulate random draw of individuals from the combined community of observed technical replicates;

<sup>c</sup>  $\Delta d\%$  is the relative difference between dispersion of observed replicates and dispersion of null replicates.  $\Delta d\%$  values are all larger than 12%;

<sup>d</sup> F values are presented as mean ± standard deviation of the comparisons between observed and 1000 null datasets;

<sup>e</sup> P values are all significant, indicating the observed technical replicates are significantly more different from each other than null expectation of random sampling.
